# Supplementary material
Source: publisher figshare collection journal article supplement (https://acs.figshare.com/ndownloader/files/28656240)
Supplement: Supplementary file 1 [file 28656240]

Compound_ID	SMILES	A. fumigatus ATCC 204305 MIC (ƒÊg/mL)	A. fumigatus ATCC 204305 MIC + bovine serum (BS) (ƒÊg/mL)	A. fumigatus SR47013 Cyp51A; Y121F MIC (ƒÊg/mL)	C. albicans ATCC 90028 MIC (ƒÊg/mL)	Met. Stab. HLM (%)	Met. Stab. RLM (%)	Free unit (%)	Clearance (mL/min/kg)	Vdss (L/kg)	calc. pKa	calc. logP
2	CC1=CC(C)=CC=C1OC2=CC=CC=C2C3=CSC(/N=C4NCCCN/4)=N3	2		2	<0.063	64	0.2	<0.1	51.4	4.92	7.1	5.94;
3a	CC1=CC(C)=CC=C1OC2=CC=CC=C2C3=CSC(N)=N3	>16			4						5.2	;
3b	CC1=CC(C)=CC=C1OC2=CC=CC=C2C3=CSC(N(C)C)=N3	>16			>16						5.2	;
3c	CC1=CC(C)=CC=C1OC2=CC=CC=C2C3=CSC(NC4=NC=CC=C4)=N3	>16			>16						5.1	;
3d	CC1=CC(C)=CC=C1OC2=CC=CC=C2C3=CSC(NC4=NC=CC=N4)=N3	>16			>16						4.4	;
3e	CC1=CC(C)=CC=C1OC2=CC=CC=C2C3=CSC(/N=C(NC)/NC)=N3	>16			>16						7.1	;
3f	CC1=CC(C)=CC=C1OC2=CC=CC=C2C3=CSC(/N=C4NCCN/4)=N3	>16			0.5						7.1	;
3g	CC1=CC(C)=CC=C1OC2=CC=CC=C2C3=CSC(/N=C4NCCCCN/4)=N3	>16			1						7.1	;
3h	CC1=CC(C)=CC=C1OC2=CC=CC=C2C3=CSC(/N=C4N(C)CCCN/4)=N3	>16			8						7.1	;
4a	CC1=CC(C)=CC=C1OC2=CC=CC=C2C3=CN=C(/N=C4NCCCN/4)S3	>16			>16							;
4b	CC1=CC(C)=CC=C1OC2=CC=CC=C2C3=NSC(/N=C4NCCCN/4)=N3	>16			>16							;
4c	CC1=CC(C)=CC=C1OC2=CC=CC=C2C3=CC=CC(/N=C4NCCCN\4)=N3	4			0.5							;
5a	C1(C2=CSC(/N=C3NCCCN/3)=N2)=CC=CC(C4=CC=CC=C4)=C1	1			<0.063							5.07;
5b	C1(C2=CSC(/N=C3NCCCN/3)=N2)=CSC(C4=CC=CC=C4)=C1	4			0.063	70	30					4.88;
5c	C1(C2=CSC(/N=C3NCCCN/3)=N2)=CSC(C4=CC=CC=C4)=N1	0.5			<0.063	83	31	1.04	33.1	7.25		4.05;
5d	C1(C2=CSC(/N=C3NCCCN/3)=N2)=NN(C4=CC=CC=C4)C=C1	>16			0.5	38	1.6					3.33;
5e	C1(C2=CSC(/N=C3NCCCN/3)=N2)=COC(C4=CC=CC=C4)=N1	16			0.063							3.17;
6a	O=C(C(C=C1)=CC=C1C2=NC(C3=CSC(/N=C4NCCCN/4)=N3)=CS2)O	>16										4.15;
6b	OC(C=C1)=CC=C1C2=NC(C3=CSC(/N=C4NCCCN/4)=N3)=CS2	2	>16			86	53					3.68;
6c	OC1=CC=CC(C2=NC(C3=CSC(/N=C4NCCCN/4)=N3)=CS2)=C1	4				77	35					3.7;
6d	OC(C=CC=C1)=C1C2=NC(C3=CSC(/N=C4NCCCN/4)=N3)=CS2	0.5	8			30	38					4.32;
6e	C1(C2=CSC(/N=C3NCCCN/3)=N2)=CSC(C4=CC=NC=C4)=N1	0.5	4			58	9					2.79;
6f	C1(C2=CSC(/N=C3NCCCN/3)=N2)=CSC(C4=CN=CC=C4)=N1	0.5	2			78	19					2.97;
6g	C1(C2=CSC(/N=C3NCCCN/3)=N2)=CSC(C4=NC=CC=C4)=N1	16										2.97;
6h	CS(C(C=C1)=CC=C1C2=NC(C3=CSC(/N=C4NCCCN/4)=N3)=CS2)(=O)=O	2	4	2		87	53	6.7	12.3	4.21		2.78;
6i	CS(C1=CC=CC(C2=NC(C3=CSC(/N=C4NCCCN/4)=N3)=CS2)=C1)(=O)=O	4	16			85	47					2.73;
